# Supplementary material
Source: HighWire-hosted journal article supplement (https://jnm.snmjournals.org/highwire/filestream/94066/field_highwire_adjunct_files/0/66993_Supplemental_Figures.pdf)
Supplement: 66993_Supplemental_Figures.pdf [file 66993_Supplemental_Figures.pdf]

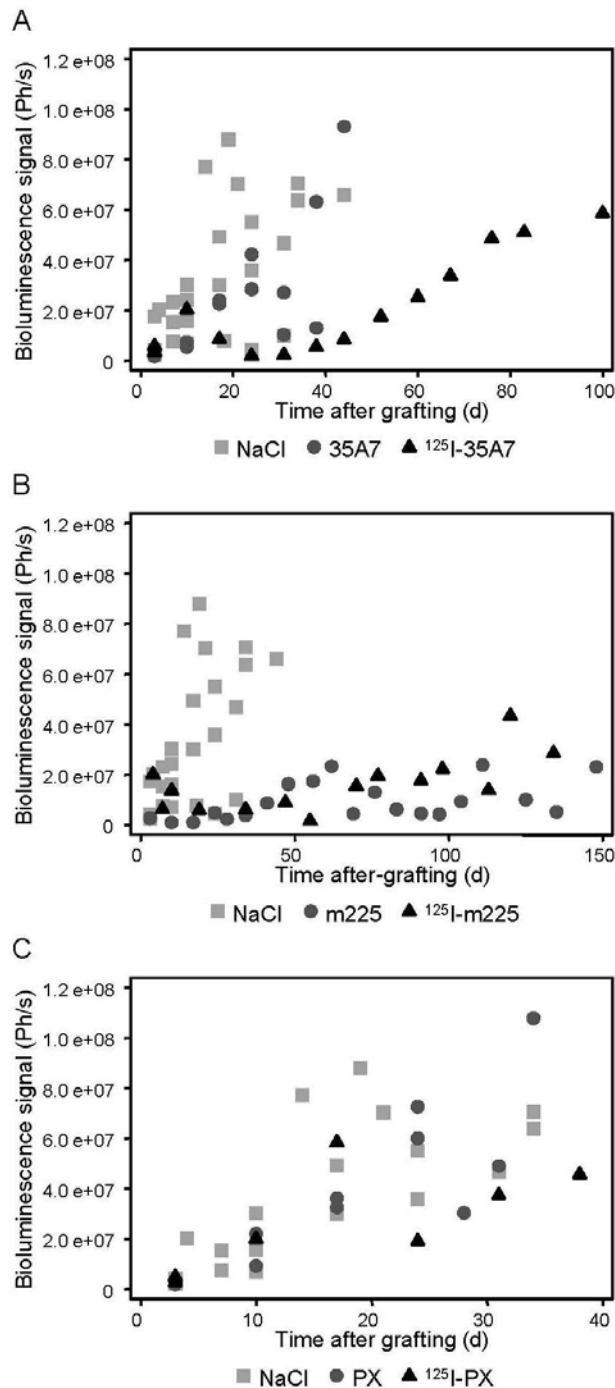

Supplemental Figure 1. Swiss nude mice bearing intraperitoneal A-431 tumor cell xenografts were injected twice with 37 MBq of <sup>125</sup>I-mAbs (370 MBq/mg) or with unlabelled mAbs (100 µg). Untreated controls were injected with NaCl. Tumor growth was followed by bioluminescence imaging after injections of A) non-internalizing 35A7 mAbs, B) internalizing m225 mAbs, C) irrelevant PX mAbs.

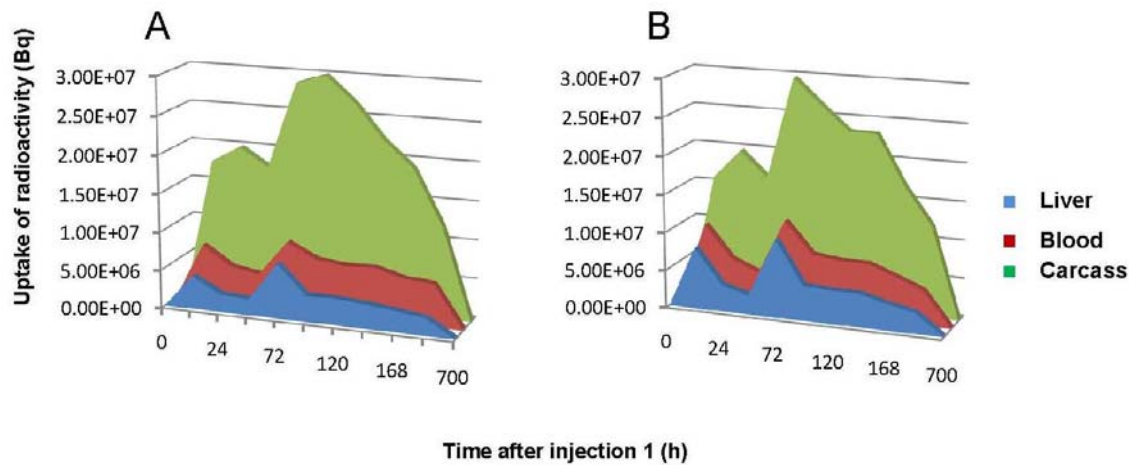

Supplemental Figure 2. Uptake of radioactivity. Uptake of radioactivity by the liver, blood and carcass (Bq) was determined using the values obtained during the biodistribution experiments (see Figure 4) that were multiplied by 200 to account for the real amount of injected labeled mAbs during RIT experiments. Weight was considered to be similar in RIT and biodistribution experiments. A) Non internalizing  $^{125}\text{I}$ -mAbs. B) Internalizing  $^{125}\text{I}$ -mAbs.
